1 New insights from short and long reads sequencing to  
2 explore cytochrome *b* variants of *Plasmopara viticola*  
3 populations collected in vineyard and related to resistance  
4 to complex III inhibitors

5

6 Semcheddine Cherrad<sup>1¶\*</sup>, Benjamin Gillet<sup>2¶</sup>, Julien Dellinger<sup>2</sup>, Lalie Bellaton<sup>2</sup>, Pascale Roux<sup>2</sup>,  
7 Catalina Hernandez<sup>3</sup>, Hervé Steva<sup>4</sup>, Lauriane Perrier<sup>3</sup>, Sandrine Hughes<sup>2&\*</sup>, Sébastien  
8 Vacher<sup>1&</sup>

9

10 <sup>1</sup>CONIDIA, Parc d'activités en Chuel, Route de Chasselay, 69650 Quincieux, France

11 <sup>2</sup>Institut de Génomique Fonctionnelle de Lyon (IGFL), CNRS UMR 5242, Ecole Normale  
12 Supérieure de Lyon, INRAE USC 1370, Université Claude Bernard Lyon 1, 69364 Lyon  
13 Cedex 07, France

14 <sup>3</sup>CONIPHY, Parc d'activités en Chuel, Route de Chasselay, 69650 Quincieux, France

15 <sup>4</sup>CJH SARL, 21 C Chemin de la Girotte, 33650 La Brede, France

16

17 ¶These authors contributed equally to this work.

18 &These authors also contributed equally to this work.

19 \* Corresponding authors: [sandrine.hughes@ens-lyon.fr](mailto:sandrine.hughes@ens-lyon.fr); [s.cherrad@conidia.fr](mailto:s.cherrad@conidia.fr)

20

21 Short title: NGS sequencing to study *Plasmopara viticola* resistance to complex III inhibitors  
22 in field populations

- 23 Keywords: cytochrome *b*, downy mildew, complex III inhibitors, resistance, long and short  
24 reads sequencing, L201S, E203-DE-V204, E203-VE-V204

## 25 Abstract

26 Downy mildew is caused by *Plasmopara viticola*, an obligate oomycete plant pathogen, a  
27 devastating disease for grapevine. To preserve plants from the disease, complex III inhibitors are  
28 among the widely used fungicides that specifically target the mitochondrial cytochrome *b* (*cytb*)  
29 of the pathogen to block cellular respiration mechanisms. In French vineyard, *P. viticola*  
30 developed resistance against a first category of these fungicides, the Quinone outside inhibitors,  
31 by exhibiting a single amino acid substitution G143A in its *cytb* mitochondrial sequence. Their  
32 usage was restricted and another kind of fungicides, Quinone inside inhibitors, targeting the  
33 same gene and highly effective against oomycetes, were used instead. Recently however, less  
34 sensitive *P. viticola* populations were detected after treatments with some inhibitors, in  
35 particular ametoctradin and cyazofamid. By isolating resistant single-sporangia strains of *P.*  
36 *viticola* to these fungicides, we characterized new variants in *cytb* sequences associated with  
37 cyazofamid resistance: a point mutation (L201S) and more strikingly, two insertions (E203-DE-  
38 V204, E203-VE-V204). In parallel with classical tools, pyrosequencing and RT-PCR, we then  
39 benchmarked both short and long-reads NGS technologies (Ion Torrent, Illumina, Oxford  
40 Nanopore Technologies) to sequence the complete *cytb* with the prospect to detect and assess  
41 the proportion of resistant variants of *P. viticola* at a natural population scale. Eighteen  
42 populations collected from French vineyard fields in 2020 were analysed: 12 show a variable  
43 proportion of G143A, 11 of E203-DE-V204 and 7 populations of the S34L variant that confers  
44 resistance to ametoctradin. Interestingly, long reads were able to identify variants, including  
45 SNPs, with confidence and detect a small proportion of *P. viticola* showing several variants  
46 along the same *cytb* sequence. Altogether, NGS appear promising methods to evaluate pathogen  
47 resistance towards fungicides related to *cytb* modifications at a population scale in the field.

48 This approach could be rapidly a robust decision-support management tool for vineyard in

49 future.

50

## 51 Introduction

52 Fungal plant pathogen diseases can damage plant and crops, causing highly destructive impact  
53 in agriculture activities and food production. *Plasmopara viticola* is an obligate oomycete plant  
54 pathogen and the causal agent of downy mildew, the most devastating disease in grapevine. *P.*  
55 *viticola* infects all green organs of host plant and has an alternating life cycle between sexual  
56 overwintering phase and asexual multiplication during the growing season, causing primary and  
57 secondary infection cycles respectively [1–6]. Currently management strategies of downy  
58 mildew include multi-site fungicides like copper-based fungicides, such as Bordeaux mixture  
59 and the dithiocarbamates, as preventive treatment. Then, single-site fungicides, such as  
60 phenylamides (e.g. metalaxyl), QoI (Quinone outside Inhibitors; e.g. azoxystrobin), carboxylic  
61 acid amides (CAA; e.g. mandipropamid), and more recently, complex III inhibitors Qil's  
62 (Quinone inside Inhibitors; e.g. cyazofamid and amisulbrom), are often introduced in  
63 management program (see Fungicide Resistance Action Committee – FRAC - Code List 2021  
64 for details [7]). Complex III inhibitors target the mitochondrial cytochrome *b* (*cytb*) protein and  
65 block cellular respiration mechanisms [8].

66 The mitochondrial respiratory chain consists of multifunctional, oligomeric membrane enzyme  
67 complex. Cytochrome *bcl* complex (complex III) is a key enzyme in mitochondrial electron  
68 transport chain. *Cytb* is a subunit of complex III that catalyses the transfer of electrons from  
69 ubiquinol to cytochrome *c* leading to protons translocation and energy transduction. The *cytb*  
70 protein contains eight transmembrane helices encoded by the *cytb* gene. The widely used  
71 complex III inhibitor's fungicides target sites on these helices with different strategies [8,9].

72 The fungicides known as QoI's block mitochondrial respiration by binding to Qo site [9,10].  
73 QoI fungicide-resistant isolates were detected in field populations of many plant pathogens such  
74 as *Erysiphe necator* [11,12], *P. viticola* [13], *Alternaria sp.* [14,15], *Mycosphaerella*

75 *graminicola* [16,17] and many others [7]. In French vineyard, downy mildew populations (*P.*  
76 *viticola*) have developed resistance to QoI's fungicides by a single amino acid substitution  
77 G143A in *cytb* [9,13,18,19]. The use of this single-target fungicide group was restricted after  
78 the widespread of the resistance.

79 The fungicides known as QiI's inhibit the reduction of quinol in Qi site close to the  
80 mitochondrial matrix. These fungicides are highly effective against oomycetes and play an  
81 important role in downy mildew management programs nowadays. Recently however, less  
82 sensitive *P. viticola* populations to ametoctradin (QoSI fungicide, Quinone outside Stigmatellin  
83 binding sub-site Inhibitor; FRAC Code List 2021 [7]) and cyazofamid (QiI fungicide), were  
84 detected in vineyard [20,21]. The origin of this resistance was unknown with different possible  
85 hypotheses. The specific resistance could result of new modifications in the *cytb P. viticola*  
86 sequence, such as S34L that is predicted to destabilise the fungicide binding in the case of  
87 ametoctradin [22], or potentially new mutations never described yet. Alternatively, or in  
88 combination, and although mutations in the inhibitor binding sites within *cytb* represent most  
89 cases of reported resistance, it is known that other mechanisms may induce resistance to some  
90 fungicides ([22] for review), in particular by the activation of a mitochondrial alternative oxidase  
91 (AOX). This mechanism of alternative respiration pathway was already observed in collected  
92 *P. viticola* populations that were not submitted to QoSI (ametoctradin) and QiI's (cyazofamid)  
93 pressure selection [20,21].

94 To better characterize the origin of the new resistance observed in the vineyard, the aim of this  
95 study was to isolate sensitive and resistant single-sporangia strains to ametoctradin and  
96 cyazofamid by biological tests and analyse the resistant strains by molecular approaches. Leaf  
97 disc sensitivity bioassay was performed on isolated strains to investigate cross-resistance  
98 between QoI, QiI and QoSI fungicides. *Cytb* sequences of the isolated single-sporangia strains  
99 were sequenced by Sanger and analysed to characterize new possible molecular mechanisms of

100 resistance to these fungicides in *P. viticola*. To go further and analyse *cytb* polymorphism at a  
101 natural population scale, NGS technologies were first benchmarked to sequence the complete  
102 *cytb* from single-sporangia strains and then applied to analyse field populations of *P. viticola*.  
103 Still relatively poorly present in studies associated to plant pathogen resistance to fungicide and  
104 targeting usually full pathogen genomes [23,24], both short-read (Ion Torrent and Illumina) and  
105 long-read (Oxford Nanopore Technologies, ONT) technologies were tested and compared in our  
106 study. They revealed to be efficient to identify and monitor *cytb* variants in natural populations  
107 but also promising to become a robust tool for decision-support in management of fungicide  
108 resistance, potentially directly in the field, in near future.

## 109 **Materials and methods**

### 110 ***P. viticola* populations and culture conditions**

111 Downy mildew infected leaves were randomly collected from vineyards of different France  
112 regions in 2016, 2017, 2018 and 2020. Sampling was carried out in vineyards with fungicide  
113 protection programs including or not complex III inhibitors. More than 50 leaf discs surrounding  
114 infected lesion (oil spot) per sample were prepared from collected leaves. Leaf discs were placed  
115 onto Petri dish, washed with distilled water and dried at room temperature. After 24h incubation,  
116 new sporangia of downy mildew were collected in sterile water to inoculate decontaminated  
117 fungicide-free leaves from grape cultivar *Vitis vinifera* cv. Cabernet-Sauvignon. Inoculated  
118 leaves were incubated in Petri dishes for 7 days at 22°C with a 16 hours of light:8 hours of dark  
119 photoperiodic lighting. Freshly produced sporangia were harvested to inoculate testing leaf  
120 discs.

## 121 **Chemical fungicides**

122 Commercial formulations of ametoctradin (SNOOKER, concentrated solution containing 200g  
123 active ingredient (AI) L<sup>-1</sup>, BASF, France) and cyazofamid (RANMAN TOP, concentrated  
124 suspension containing 160g AI L<sup>-1</sup>, ISK Biosciences Europe, France) were tested. The fungicide  
125 formulations were dissolved in sterile distilled water. Stock solutions were stored at 4°C in the  
126 dark.

## 127 **Resistant single-sporangia isolates and cross-resistance assay**

128 Leaf discs with sporulating colonies at 1mg.L<sup>-1</sup> of cyazofamid or ametoctradin with 100mg.L<sup>-1</sup>  
129 of SHAM (Salicylhydroxamic acid, Sigma-Aldrich, France), as inhibitor of alternative  
130 respiration (AOX), were used to isolate resistant strains of *P. viticola*. Collected populations  
131 showing high level of non-specific resistance on fungicide without SHAM were also used to  
132 isolate AOX-strains. Thus, monitoring of sensitivity assays using fungicide, alone or with  
133 SHAM, was used to select strains developing resistance involving either AOX respiration (non  
134 specific resistance) or *cytb* target mutation mechanism. Indeed, strains showing sporulation on  
135 leaf discs with both fungicide and SHAM had specific resistance mechanism, probably inducing  
136 *cytb* target modification. In other hand, strains growing only on fungicide without SHAM  
137 involve AOX activity.

138 To investigate cross-resistance, *in vitro* sensitivity of these strains to ametoctradin and  
139 cyazofamid, applied alone or mixed with SHAM, was measured with increasing concentrations  
140 of each fungicide (0.01mg.L<sup>-1</sup> to 100mg.L<sup>-1</sup>). Ten discs were analysed for each condition and  
141 assays for each isolate were repeated three times per fungicide concentration. After 12 days,  
142 individual leaf discs were evaluated for disease incidence and sporulation rate.



## 143 **Total DNA extraction and PCR amplification**

144 Single-sporangia strains of *P. viticola* growing leaf discs 7 days post inoculation were used as  
145 starting material for DNA extraction and PCR amplification. Total DNA was extracted using  
146 the Nucleospin® plant II kit (Macherey-Nagel GmbH & Co., Düren, Germany) according to the  
147 manufacturer's recommendations. The same approach was used for natural populations  
148 collected from field, except that DNA was extracted from freshly inoculated leaves as previously  
149 described.

150 PCR amplification of 1kb fragment of *cytb* gene was carried out in 25µL reaction mixtures with  
151 30ng of total genomic DNA, set of forward (5'-TGAACCTGTAAATTTAGCACAACAA-3')  
152 and reverse (5'-ACAGGACATTGACCAACCCA-3') primers (0.3µM) and 1X premixed  
153 Phusion Flash High-Fidelity PCR Master Mix (Thermo Scientific, France). Amplifications were  
154 carried out in a thermal cycler LifeEco (BIOER Technology, France) using the following PCR  
155 program: initial denaturation at 94°C for 1min followed by 35 cycles at 95°C for 30s, 60°C for  
156 1min, and 72°C for 1 min and a final extension at 72°C for 10min. Amplification products were  
157 then subjected to direct Sanger sequencing, using the same primers as for PCR amplification  
158 (GATC Biotech, Germany). To analyse *cytb* gene partial sequence and investigate point  
159 mutations in resistant strains, the new sequences were aligned with Jalview [25] against a *P.*  
160 *viticola* *cytb* sequence used as reference (accession number DQ459459.1) and against sequences  
161 of sensitive strains.

162

## 163 **Pyrosequencing assay design for *cytb* alleles quantification**

164 Pyrosequencing technology was used to investigate allele's frequencies of modifications  
165 detected in *cytb* genes amplified from different samples: field isolated strains (selected single-  
166 sporangia strains) and samples from natural populations (mixed sporangia collected in the field).

167 PCR reactions for pyrosequencing were performed in a final volume of 50µl containing 30ng  
168 genomic DNA, 12.5µl of PyroMark PCR Master Mix (Qiagen, France), 2.5µl of CoralLoad  
169 concentrate (Qiagen, France), 5µM of CONIPHY designed reverse and forward primers (*P.*  
170 *viticola* PyroID kit, CONIPHY, France) using PyroMark Assay Design version 2.0 (Qiagen,  
171 France). Target region of *cytb* gene with the insertion of nucleotides was amplified using the  
172 following program: 95°C for 15min, followed by 45 cycles (94°C for 30s, 60°C for 30s and  
173 72°C for 30s) and a final DNA extension at 72°C for 10min (following manufacturer  
174 recommendations). PCR products (3µl of the initial reaction mixture) were separated on a 1.2%  
175 agarose gel stained with SYBR® Safe (Invitrogen™, France). Gel production and  
176 electrophoresis were conducted using TAE buffer (40mM Tris-acetate pH 8.0, 1mM EDTA).  
177 Pyrosequencing reactions were performed in a PyroMark Q48 Autoprep instrument (Qiagen,  
178 France) using PyroMark® Q48 Advanced Reagents kit (Qiagen) with 3µl of PyroMark Q48  
179 magnetic beads (Qiagen) and 10µl of biotinylated PCR products following manufacturer's  
180 instructions. The sequencing primers provided in dedicated PyroID kit (CONIPHY, France)  
181 were used to detect E203-DE-V204 and L201S or E203-VE-V204. For validation of assays, 5  
182 replicates of total DNA extracted from sensitive and resistant single sporangia isolates were  
183 analysed. Allele frequencies were estimated using PyroMark software.

184

## 185 ***Cytb* PCR amplification and sequencing by short and long reads**

### 186 **NGS technologies**

187 NGS technologies were explored to characterize *cytb* variants from sensitive or resistant single-  
188 sporangia isolated strains (7 DNA extracts tested). After this validation step, NGS were used to  
189 detect the presence and proportion of sensitive strains among natural populations collected in

190 French vineyard in 2020 (18 DNA extracts tested). This was done by amplifying the complete  
191 *cytb* from the total DNA extracted and by sequencing the amplicons by short and long-read  
192 technologies.

193 For all the 25 samples analysed, complete *cytb* was amplified using two different strategies: in  
194 5 overlapping fragments (302 to 375 bp long) to perform short-read sequencing (Illumina or Ion  
195 Torrent), and in a single fragment (1457 bp long) to perform long-read sequencing (ONT).

196 Five primer pairs were designed by Ion AmpliSeq Designer (Thermofisher Scientific) using  
197 DQ459459.1 as a reference. For short-read approaches, the five overlapping fragments were  
198 amplified separately in 25µl in a mix including 2X TaqMan™ Environmental Master Mix 2.0  
199 (Applied Biosystems), 1µl of each primer at 10nM and 10ng of genomic DNA. PCR  
200 amplifications were carried out in a Veriti Thermocycler (Thermofisher Scientific) using the  
201 following PCR conditions: initial denaturation at 94°C for 5s followed by 35 cycles at 94°C for  
202 30s, 55°C to 65°C (depending on primers set) for 45s, and 72°C for 1min and a final extension  
203 at 72°C for 7min. The five amplicons were then pooled for each sample in an equimolar manner.

204 For long-read approach, long-range PCR was performed to amplify the complete gene with the  
205 same mix composition as above except that the LongAmp HotStart Taq 2X Master Mix (New  
206 England Biolabs) was used instead. The primers used correspond to the most extreme forward  
207 and most extreme reverse primers designed above. The PCR program was the following: initial  
208 denaturation at 94°C for 10min followed by 40 cycles at 94°C for 30s, 60°C for 45s, and 65°C  
209 for 2min and a final extension at 65°C for 7min.

210 For Ion Torrent, the barcoded libraries were built from pooled amplicons by a ligation protocol  
211 using the Ion Xpress™ Plus Fragment Library Kit and following the recommendations of the  
212 manufacturer. Pooled libraries were sequenced in SE 400bp on a 318 Ion chip using a PGM  
213 sequencer (Thermofisher Scientific). For Illumina and ONT, fusion primers (i.e. containing

214 partial adapters sequences specific of respectively Illumina or ONT) were used for the first PCR.  
215 In both cases, a second PCR was performed to add indexes/barcodes and to complete the  
216 libraries construction. Illumina barcoded libraries were sequenced with a Reagent kit v2 in PE  
217 2x250bp on a MiSeq sequencer. Nanopore libraries were finalized and barcoded with the PCR  
218 Barcoding kit protocol (SQK-PBK004, ONT) and sequenced on Flongle flow cells (FLO-  
219 FLG001, ONT) with Mk1C or MinION coupled with MinIT. High accuracy basecalling was  
220 performed for all Nanopore runs with Guppy version 3.2.9 or 4.3.4.  
221 Short and long raw reads datasets were deposited to SRA database under BioProject accession  
222 N°XXXXXX.

## 223 **NGS data analyses**

224 Ion Torrent reads were analysed using the AmpliSeq design above and DQ459459.1 as a  
225 reference. Torrent Variant Caller (TVC) plugin proposed by Thermofisher Scientific in the  
226 Torrent Suite Software was launched with a generic configuration for somatic and low  
227 stringency parameters. In this configuration, 2000 reads are considered to characterize new  
228 variants and low frequency detection is optimized (usually detection is not given below 5%).  
229 Illumina reads were analysed with Galaxy Europe (<https://usegalaxy.eu>) or with our own  
230 instance. Roughly, for each sample, R1 and R2 reads were paired and then sorted by type of  
231 fragment. Five thousand reads were sampled for each of the 5 fragments and mapped with  
232 minimap2 [26] on the DQ459459.1 reference. The Bayesian genetic variant detector FreeBayes  
233 [27] was used (option simple diploid calling with filtering and coverage) to find polymorphisms  
234 and VCFlib [28] used to extract the variable positions in a table format with reads count.  
235 Nanopore reads were analysed with a dedicated pipeline designed in command lines. Only reads  
236 higher than Q7 were considered. Five thousand reads were sampled for each sample and mapped

237 on the DQ459459.1 reference with minimap2. Six regions or positions identified by this study  
238 as variable were searched with either a BLAST [29] approach or a Nanopolish  
239 (<https://github.com/jts/nanopolish>) analysis. Frequency at each position was estimated by  
240 counting the number of reads with the variant versus the total reads number.

241 To identify complete *cytb* sequence with multiple polymorphisms, each single polymorphism  
242 was searched independently among the previous 5000 long reads sampled. All unique reads  
243 containing at least one polymorphism were then considered as a whole and proportion of reads  
244 containing one or multiple variants along the same read were computed. R package “ggvenn”  
245 was used to draw Venn diagrams and to obtain percentage of reads corresponding to each  
246 possible combination. Presence of several polymorphisms along the same read was checked by  
247 aligning read against the reference and confirmed by eye on randomly picked reads.

## 248 **Results and discussion**

### 249 **Sensitivity of field isolates to ametoctradin and cyazofamid**

250 Many downy mildew field populations with low sensitivity to ametoctradin and cyazofamid at  
251 different levels were observed in French vineyards since 2016. Resistant and sensitive  
252 populations were selected to generate single-sporangia isolates. More than 70 single-sporangia  
253 strains were isolated including 41 resistant to cyazofamid (QiI), 5 to ametoctradin (QoSI), 7 to  
254 pyraclostrobin (QoI, data not shown), 15 to ametoctradin and pyraclostrobin, and 3 strains  
255 showing non-specific resistance with AOX expression. Further investigation on cross resistance  
256 and genotypic characterization was conducted on a panel of 22 strains listed in Table 1.

| <i>P. viticola</i><br>strains | Ametoctradin (QoSI) |       |          | Cyazofamid (QiI) |       |          | Modification of <i>cytb</i> sequence observed |      |              |              |       |
|-------------------------------|---------------------|-------|----------|------------------|-------|----------|-----------------------------------------------|------|--------------|--------------|-------|
|                               | Alone               | +SHAM |          | Alone            | +SHAM |          | G143A                                         | S34L | E203-DE-V204 | E203-VE-V204 | L201S |
| CONI-01                       | 0.3                 | <0.1  | S        | <0.1             | <0.1  | S        | -                                             | -    | -            | -            | -     |
| CONI-04                       | >100                | 0.3   | S        | 30               | <0.1  | S        | -                                             | -    | -            | -            | -     |
| CONI-02                       | 0.3                 | 0.3   | S        | <0.1             | <0.1  | S        | X                                             | -    | -            | -            | -     |
| CONI-03                       | 0.3                 | 0.3   | S        | <0.1             | <0.1  | S        | X                                             | -    | -            | -            | -     |
| CONI-11                       | >100                | 0.3   | S        | 30               | <0.1  | S        | X                                             | -    | -            | -            | -     |
| CONI-12                       | >100                | 0.3   | S        | 30               | <0.1  | S        | X                                             | -    | -            | -            | -     |
| CONI-20                       | >100                | 100   | <b>R</b> | <0.1             | <0.1  | S        | -                                             | X    | -            | -            | -     |
| CONI-22                       | >100                | 100   | <b>R</b> | <0.1             | <0.1  | S        | -                                             | X    | -            | -            | -     |
| CONI-06                       | >100                | 100   | <b>R</b> | <0.1             | <0.1  | S        | X                                             | X    | -            | -            | -     |
| CONI-13                       | 100                 | 100   | <b>R</b> | <0.1             | <0.1  | S        | X                                             | X    | -            | -            | -     |
| CONI-05                       | 1                   | 1     | S        | 100              | 30    | <b>R</b> | -                                             | -    | X            | -            | -     |
| CONI-07                       | 1                   | 0.3   | S        | 100              | 30    | <b>R</b> | -                                             | -    | X            | -            | -     |
| CONI-15                       | 1                   | 0.3   | S        | 100              | 30    | <b>R</b> | -                                             | -    | X            | -            | -     |
| CONI-16                       | 1                   | 0.3   | S        | 100              | 30    | <b>R</b> | -                                             | -    | X            | -            | -     |
| CONI-08                       | >100                | 0.3   | S        | 100              | 30    | <b>R</b> | -                                             | -    | X            | -            | -     |
| CONI-09                       | >100                | 0.3   | S        | 100              | 30    | <b>R</b> | -                                             | -    | X            | -            | -     |
| CONI-10                       | >100                | 0.3   | S        | 100              | 30    | <b>R</b> | -                                             | -    | X            | -            | -     |
| CONI-17                       | 1                   | 0.3   | S        | 100              | 30    | <b>R</b> | -                                             | -    | X            | -            | -     |
| CONI-31                       | >100                | 0.3   | S        | 30               | 30    | <b>R</b> | -                                             | -    | -            | -            | X     |
| CONI-38                       | 10                  | 0.3   | S        | 30               | 30    | <b>R</b> | -                                             | -    | -            | -            | X     |
| CONI-39                       | >100                | 0.3   | S        | 30               | 10    | <b>R</b> | -                                             | -    | -            | X            | -     |
| CONI-41                       | 0.3                 | 0.3   | S        | 30               | 10    | <b>R</b> | -                                             | -    | -            | X            | -     |

**Table 1:** MIC (Minimum Inhibitory Concentration) values for ametoctradin and cyazofamid of *P. viticola* field isolated strains and detected mutations or insertions in *cytb* gene compared to the reference DQ459459.1. A dash indicates no modification, a cross indicates detection of the variant. R: resistant; S: Sensitive, indicate resistance state when AOX mechanism is blocked by SHAM and probably results from *cytb* modifications in most part.

257 **Molecular analysis of field isolates *P. viticola* *cytb* gene**

258 **Confirmation of S34L substitution in cytochrome *b* conferring resistance to**  
259 **ametoctradin**

260 According to their sensitivity to ametoctradin, growth of 4 strains of *P. viticola* (CONI-06,  
261 CONI-13, CONI-20, CONI-22) was inhibited at 100 mg.L<sup>-1</sup> of ametoctradin applied alone or  
262 mixed with SHAM. These strains exhibited high level of resistance (Resistance Factor = 1000)  
263 to ametoctradin compared with sensitive strain CONI-01 (MIC <0.1 mg.L<sup>-1</sup>). These strains are  
264 sensitive to cyazofamid (<0.1 mg.L<sup>-1</sup>) applied alone or with SHAM (Table 1). Loss of sensitivity  
265 in these strains seems to be caused by target modification affecting specifically ametoctradin  
266 mode of action. Analysis of *cytb* gene sequences of these strains, obtained by Sanger  
267 sequencing, reveals the presence of single nucleotide mutation of cytosine to thymine at position  
268 101 (TCA → TTA). This mutation in *cytb* gene leads to substitution of amino acid serine with  
269 leucine at position 34 (S34L) in ametoctradin resistant *P. viticola* isolates (Fig 1A). In other  
270 hand, no cross resistance was observed in strains carrying S34L substitution with cyazofamid.  
271 Among strains with G143A substitution, conferring resistance to QoI fungicide, *cytb* gene  
272 sequence of two isolates (CONI-06 and CONI-13) contains both S34L and G143A substitutions  
273 (Table 1). Tested with leaf discs bioassays, these strains are resistant to both pyraclostrobin  
274 (QoI) and ametoctradin (data not shown). Ametoctradin has been first described as QoSI  
275 inhibitor acting on the Qo site [30]. However, serine S34 of *P. viticola* *cytb* is located in the  
276 Quinone inside site (Qi) suggesting that ametoctradin inhibits mitochondrial respiration by  
277 interacting with complex III in Qi site. The results suggest that the mode of action of  
278 ametoctradin in Qi site is different from that of cyazofamid. They confirm recent investigation  
279 on the binding mode of ametoctradin with its target site in cytochrome *bcl* complex showing

280 that the anti-oomycete fungicide ametoctradin is able to interact with both Qo and Qi sites  
281 [20,22,31].

**Fig 1. Alignment of *cytb* partial sequences of cyazofamid and ametoctradin *P. viticola* resistant isolates.** In black: sequence of sensitive strain. In red: sequences of strains resistant to cyazofamid or ametoctradin accordingly. In blue: AOX strain. Sequences of strains with S34L substitution (**A**), GATGAG insertion (**B**), GTAGAG insertion (**C**) and L201S substitution (**D**).

282  
283 **L201S substitution and two different 6bp insertions (E203-DE-V204 and**  
284 **E203-VE-V204) in *cytb* coding gene confer resistance to cyazofamid**

285 Sensitivity bioassays revealed 41 isolates of *P. viticola* resistant to cyazofamid applied alone or  
286 mixed with SHAM at a discriminating dose (1mg.L<sup>-1</sup>). Further analysis of 12 strains reveals that  
287 *P. viticola* development of 10 isolates was inhibited at 30mg.L<sup>-1</sup> and 2 isolates (CONI-39 and  
288 CONI-41) at 10mg.L<sup>-1</sup> of cyazofamid+SHAM compared to sensitive strain CONI-01 (<0,1  
289 mg.L<sup>-1</sup>) (Table 1). The *cytb* sequences of 31 of these isolated resistant strains show a 6  
290 nucleotides insertion, GATGAG, compared to cyazofamid-sensitive strains and the reference  
291 DQ459459.1. This short sequence insertion leads to protein modification with two additional  
292 amino acids (E203-DE-V204) (Fig 1B). A second 6 nucleotides insertion, GTAGAG, is  
293 observed in two other strains leading to another amino acid modification E203-VE-V204 (Fig  
294 1C). Finally, *cytb* sequences of 2 isolated strains, referenced CONI-31 and CONI-38, inhibited  
295 at 30mg.L<sup>-1</sup> of cyazofamid+SHAM, contain a single nucleotide mutation at position 602  
296 (TTA→TCA) inducing amino acid substitution L201S in *cytb* protein (Fig 1D). These three  
297 variants, all occurring in the same short region of the *cytb* gene, confer resistance to cyazofamid  
298 but no cross resistance with ametoctradin. To our knowledge, fungicide resistance caused by  
299 target modification occurred only with single nucleotide modification (SNP) in almost described



300 plant pathogens and fungicides single-site mode of action [7,32]. Insertion of short sequence in  
 301 gene coding fungicide-target, and probably protein conformational modification, without  
 302 altering protein function, could be a new way to bypass the fungicide action. Interestingly,  
 303 similar amino acid modification was introduced in yeast *cytb* mutant model and no effect was  
 304 observed on growth of yeast. Comparative protein structure modelling suggests that the two  
 305 amino acid insertion E203-DE-V204 interfere with cyazofamid binding to *cytb* in *P. viticola*  
 306 [33]. Description of six sequence variants in *P. viticola cytb* gene that are associated with  
 307 resistance to cyazofamid, ametoctradin or QoI fungicides, identified in this study or coming  
 308 from the literature, are listed in Table 2 and were targeted in the further analyses.  
 309

| Variants  | AA modifications | Reference | Variant | Type            | Resistance                     | References               |
|-----------|------------------|-----------|---------|-----------------|--------------------------------|--------------------------|
| Variant 1 | E203-DE-V204     | -         | GATGAG  | Insertion (6bp) | Cyazofamid<br>QiI fungicide    | [20], this study         |
| Variant 2 | E203-VE-V204     | -         | GTAGAG  | Insertion (6bp) | Cyazofamid<br>QiI fungicide    | This study               |
| Variant 3 | L201S            | T         | C       | Substitution    | Cyazofamid<br>QiI fungicide    | This study               |
| Variant 4 | S34L             | C         | T       | Substitution    | Ametoctradin<br>QiSI fungicide | [20, 21], this<br>study  |
| Variant 5 | F129L            | T         | A/G/C   | Substitution    | QoI fungicides                 | FRAC 2021                |
| Variant 6 | G143A            | G         | C       | Substitution    | QoI fungicides                 | FRAC 2021,<br>this study |

**Table 2:** Description of *P. viticola* variants of *cytb* gene and associated resistance to cyazofamid, ametoctradin or QoI fungicides considered in this study. DQ459459.1 is used as the reference.

310

311 **Pyrosequencing quantification of L201S substitution and the two insertions**  
 312 **in *P. viticola cytb* gene**

313 Two pyrosequencing-based methods were developed to quantify the frequency of the 3 variants  
 314 in samples. The frequencies of E203-DE-V204 and L201S were evaluated simultaneously in a

315 first assay (Supplementary Fig 1) and the frequency of E203-VE-V204 in a second assay  
316 (Supplementary Fig 2). Pyrosequencing assays were validated on DNA extracted from single  
317 sporangia cyazofamid-resistant isolates. Pyrosequencing assays on DNA extracted from single  
318 sporangia showed that cyazofamid-resistant isolates had between 96 to 98% insertions E203-  
319 DE-V204, E203-VE-V204 or substitution L201S, corroborating Sanger analysis (Fig 1) and  
320 sensitivity assays (Table 1). Finally, to evaluate the background noise, the two methods were  
321 applied to the sensitive wild-type strain (CONI-01) that present no sequence variants. In both  
322 cases, low frequencies (2-8%) of variants were observed (Supplementary Fig 1 and Fig 2)  
323 allowing to fix a threshold for accurate detection. For further analyses, only populations with  
324 variant frequency higher than 10% were considered as significantly detected by pyrosequencing.  
325 Applied to DNA extracted from natural populations collected in the field, only variant E203-  
326 DE-V204 was detected at different proportion using pyrosequencing analyses. Frequencies of  
327 variant E203-DE-V204 below 5%, or close to background noise, were measured in five  
328 populations sensitive to cyazofamid (100% efficacy; Table 3). Eleven *P. viticola* field  
329 populations contain variant E203-DE-V204 with frequencies ranging from 10 to 96%. Both  
330 observations, on single sporangia isolates and field natural populations, show significant  
331 correlation between genetic profiling by pyrosequencing and phenotypic characterization with  
332 *in vitro* biological assays. Variants E203-VE-V204 and L201S are not detected in the natural  
333 populations tested (Table 3), suggesting that the insertion E203-DE-V204 could be predominant  
334 in the field and probably at the origin of downy mildew populations resistant to cyazofamid in  
335 French vineyards.

336 Molecular characterization tools, including real-time PCR (RT-PCR), are widely used in  
337 detection and quantification of fungicide resistance in plant pathogens [11,21,34–38]. In this  
338 particular case however, RT-PCR assay design failed to analyse the two insertions of six  
339 nucleotides observed in *P. viticola* *cytb* gene, their detection relying on the pyrosequencing

340 approach only. Allele quantification using pyrosequencing technology has been used for SNP  
341 detection and quantification of QoI and CAA fungicides resistance in *P. viticola* [39,40]. In  
342 other hand, target site modification related to succinate dehydrogenase inhibitors (SDHI)  
343 resistance in *Pyrenophora teres* were identified using pyrosequencing [41]. Fields monitoring  
344 of G143A substitution in *Cercospora sojina* [42] or resistance to DMI and SDHI of *Ramularia*  
345 *collo-cygni* populations [43] have been assessed by pyrosequencing. Pyrosequencing method is  
346 a powerful alternative method allowing detection and quantification of single nucleotide  
347 polymorphism (SNP) but also, as reported in this study, that permits the detection of nucleotides  
348 insertion or deletion to assess gene modification in fungal fungicide resistance. Pyrosequencing  
349 and RT-PCR methods are accurate and less time-consuming approaches than biological assays.  
350 However, these methods are only relevant in the case of fungicide resistance mechanisms when  
351 modifications of the target are known [38]. Moreover, many reactions can be needed for a single  
352 sample if various mutations associated to fungicide resistance have to be assessed, such as  
353 G143A, S34L and L201S for example.

354 Considering the limits of the two previous methods, we explored others approaches to identify  
355 new variants or to assess the presence of known *cytb* variants and their proportion at a population  
356 scale. In this context, more recent development of new sequencing technologies, such as short  
357 and long reads NGS, are promising and open opportunities to improve quality and sensitivity of  
358 molecular detection of pathogen resistance to fungicide. For example, Whole Genome  
359 Sequencing (WGS) is already largely used to track antimicrobial resistance [44], sometimes  
360 combining short and long reads approaches [45]. In medical applications, ONT long reads  
361 generated in real-time raise hope for very rapid diagnostic to identify pathogens and antibiotic  
362 resistance [46]. ONT reveals an interesting tool for plants surveillance to detect plant virus  
363 routinely [47]. Finally, large-scale genomics studies of plant disease resistance were possible  
364 thanks to these high-throughput and cost-effective tools to clarify the interactions between

365 legumes and pathogens [48]. At a gene scale, only few studies already reported successful *cytb*  
366 sequencing by short-read NGS method for the purpose of pathogen resistance to fungicides  
367 studies. It was the case for example to detect and characterize resistance of wheat pathogen  
368 (*Zymoseptoria tritici*) to QoI [49]. However, the NGS technologies have been poorly explored  
369 in the literature for that specific purpose. We so decided to test short and long reads sequencing  
370 with the aim to develop new methods to obtain a more efficient and rapid characterization of  
371 new or known *cytb* variants of *P. viticola* in a context of fungicide resistance and that would be  
372 adapted to large population scale monitoring.

### 373 **NGS analyses of *cytb* genes from field *P. viticola* isolates**

#### 374 **Benchmarking of the NGS technologies to accurately detect variants from** 375 **single-sporangia strains**

376 The complete *cytb* gene amplified from 7 single-sporangia strains DNA extracts was analysed  
377 by long and short reads sequencing to evaluate the reliability of detection for the 3 *cytb* variants  
378 that we described with Sanger (Fig 1, Table 2). The wild type strain CONI-01 is sensitive and  
379 served as a control, the other strains were characterized as resistant and exhibit either variant  
380 E203-DE-V204, E203-VE-V204 or L201S. Both short-read (Ion Torrent) and long-read (ONT)  
381 approaches succeeded to detect the expected variant at high frequency (all values > 92% and up  
382 to 100%) in the expected samples (Supplementary Table 1). TVC tool used for Ion Torrent  
383 reads, that reports only variants with frequency higher than 5%, find successfully the specific  
384 variant with high values for quality detection. Because the variant E203-VE-V204 is a duplicate  
385 of 6bp of the original sequence that is inserted, two alternative mappings are possible (Fig 1).  
386 Few mapping artefacts were thus observed that could result in the slightly lower frequency  
387 detected by VTC for this variant (92%). For ONT long-reads, both pipelines (BLAST or

388 Nanopolish) gave close, similar and accurate estimates of the expected variant (>95%). Low  
389 frequencies (below 2% for BLAST and <5% for Nanopolish) are however detected in nearly all  
390 samples for which the variants were not expected. This suggests that below this threshold,  
391 detection of a variant cannot be trusted. According to this preliminary analysis, we arbitrarily  
392 fixed to 5% the threshold of variant detection for any NGS methods (short or long reads) and  
393 can be considered as a limit of the sensitivity of the method. Of note, the observation of a low  
394 percentage of the non-expected variant in the single-sporangia strains could be explained in  
395 different ways: by the experimental error-rate (errors induced during amplification by PCR or  
396 linked to the sequencing step), by the sensitivity of the tools used to analyse reads, but could  
397 also be an indication of heteroplasmy. Heteroplasmy is a widespread, but relatively rare,  
398 phenomenon observed in many species consisting in the presence of different types of  
399 mitochondrial DNA in the same cell [21]. Heteroplasmy has been associated as a possible way  
400 for some species to rapidly adapt to fungicide and develop resistance [50,51]. In particular,  
401 heteroplasmy has been reported for the G143A variant associated with QoI resistance [19,52],  
402 including for *P. viticola* [21].

403

#### 404 **Exploiting NGS technologies to detect proportion of variants in *P. viticola*** 405 **field populations**

406 The DNA extracted from 18 natural field populations of *P. viticola* collected in 2020 from  
407 French vineyards were used to amplify the complete *cytb* in short fragments for Illumina  
408 sequencing or in a single long fragment for ONT sequencing. Both sequencing revealed striking  
409 similar results in the detection and proportion of each variant among samples with high  
410 correlation values and  $R^2 >$  to 99% (Table 3). Two small differences were observed with the  
411 detection by ONT approach of two variants in two supplementary samples (variant S34L for

412 CONI-P5 and variant E203-DE-V204 for CONI-P6). However, both appear in a very low  
413 proportion (7% and 6% respectively, Table 3), close to the 5% chosen as a threshold to detect  
414 variants.

415 Only 3 out of the 18 samples revealed to be sensitive to the fungicides tested (ametoctradin and  
416 cyazofamid), and for which no one of the six *cytb* variants (Table 2) we were looking for were  
417 detected by NGS sequencing. The variants L201S, E203-VE-V204 and F129L were not  
418 observed in any samples suggesting that they could be rare. However, the 3 other variants, E203-  
419 DE-V204, S34L and G143A were detected. The variant G143, well known in the literature and  
420 first detected in French vineyard in 2003 [53] with several occurrence [13], is the most present,  
421 with a detection in 12 samples. Then, the variant E203-DE-V204 (Table 2) is observed in more  
422 than 50% of the samples analysed in this study, with 11 samples showing the modified *cytb* in  
423 different proportion (5 to 95%). This insertion, that we first detected in 2016 [20], is thus  
424 observed in several populations collected 4 years later and in elevated frequencies (> to 25% in  
425 7 samples; Table 3). However, these results are to be taken with caution given the reduced  
426 number of samples analysed and have to be confirmed on a larger scale study. Finally, the  
427 variant S34L is detected in 6/7 samples, in various proportion (7 to 94%). The same variant was  
428 previously reported in 2017 where 7 out of the 33 vineyards tested using allele-specific PCR  
429 assays were identified for S34L [21].

430 Results observed for NGS sequencing (short or long reads) are mostly in agreement with other  
431 molecular methods used independently to assess the presence of E203-DE-V204 variant by  
432 pyrosequencing, or the presence of G143A and S34L variants by RT-PCR. However, NGS  
433 reveal to be potentially more sensitive than RT-PCR by detecting variants at low frequency in  
434 CONI-P11 and CONI-P15. Results are also in agreement with biological tests performed to  
435 evaluate the resistance to ametoctradin (associated to variant S34L) or to cyazofamid (associated  
436 to variant E203-DE-V204).

| Samples          |                            | Biological test on leaf discs (% efficacy) |                                     | Cytb allele frequency quantification |        |                                  |                                    |        |                |                          |        |                |
|------------------|----------------------------|--------------------------------------------|-------------------------------------|--------------------------------------|--------|----------------------------------|------------------------------------|--------|----------------|--------------------------|--------|----------------|
| Field population | Location French department | Ametoctradin (1mg/l) + SHAM (100mg/l)      | Cyazofamid (1mg/l) + SHAM (100mg/l) | RT-PCR                               |        | Pyrosequencing<br>% E203-DE-V204 | NGS sequencing                     |        |                |                          |        |                |
|                  |                            |                                            |                                     | % G143A                              | % S34L |                                  | FreeBayes / Illumina (Short reads) |        |                | BLAST / ONT (Long reads) |        |                |
|                  |                            |                                            |                                     |                                      |        |                                  | % G143A                            | % S34L | % E203-DE-V204 | % G143A                  | % S34L | % E203-DE-V204 |
| CONI-P1          | 33                         | 100                                        | 35                                  | -                                    | -      | 52 ± 0.7                         | -                                  | -      | 51             | -                        | -      | 48             |
| CONI-P2          | 30                         | 100                                        | 100                                 | -                                    | -      | 3 ± 0.4                          | -                                  | -      | -              | -                        | -      | -              |
| CONI-P3          | 47                         | 100                                        | 100                                 | -                                    | -      | 4 ± 1.3                          | -                                  | -      | -              | -                        | -      | -              |
| CONI-P4          | 13                         | 100                                        | 100                                 | -                                    | -      | 4 ± 1.6                          | -                                  | -      | -              | -                        | -      | -              |
| CONI-P5          | 51                         | 98                                         | 0                                   | 8                                    | -      | 81 ± 1.1                         | 8                                  | -      | 81             | 8                        | 7      | 81             |
| CONI-P6          | 51                         | Not tested                                 | 97                                  | 94                                   | -      | 9 ± 0.4                          | 93                                 | -      | -              | 94                       | -      | 6              |
| CONI-P7          | 51                         | Not tested                                 | 82                                  | 63                                   | -      | 33 ± 0.9                         | 60                                 | -      | 30             | 64                       | -      | 28             |
| CONI-P8          | 51                         | Not tested                                 | 60                                  | 46                                   | -      | 31 ± 0.7                         | 43                                 | -      | 30             | 46                       | -      | 28             |
| CONI-P9          | 51                         | Not tested                                 | 23                                  | -                                    | -      | 96 ± 1.1                         | -                                  | -      | 95             | -                        | -      | 95             |
| CONI-P10         | 17                         | 100                                        | 69                                  | 59                                   | -      | 37 ± 1.1                         | 55                                 | -      | 35             | 57                       | -      | 36             |
| CONI-P11         | 33                         | 100                                        | 85                                  | -                                    | -      | 25 ± 1.1                         | 13                                 | -      | 23             | 13                       | -      | 22             |
| CONI-P12         | 33                         | 100                                        | 100                                 | 56                                   | -      | 6 ± 0.9                          | 47                                 | -      | -              | 48                       | -      | -              |
| CONI-P13         | 17                         | 47                                         | 67                                  | 73                                   | 88     | 10 ± 0.9                         | 69                                 | 94     | 5              | 70                       | 93     | 5              |
| CONI-P14         | 17                         | 40                                         | 100                                 | 74                                   | 79     | 4 ± 1.3                          | 82                                 | 91     | -              | 85                       | 92     | -              |
| CONI-P15         | 32                         | 65                                         | 85                                  | -                                    | -      | 7 ± 0.9                          | 6                                  | 9      | -              | 6                        | 12     | -              |
| CONI-P16         | 33                         | 55                                         | 57                                  | -                                    | 18     | 85 ± 2.4                         | -                                  | 10     | 85             | -                        | 14     | 84             |
| CONI-P17         | 33                         | 52                                         | 88                                  | 12                                   | 49     | 15 ± 1.1                         | 8                                  | 57     | 12             | 9                        | 59     | 12             |
| CONI-P18         | 51                         | 57                                         | 80                                  | 39                                   | 63     | 13 ± 2.9                         | 43                                 | 64     | -              | 43                       | 64     | -              |

**Table 3:** Characterization of fungicide resistance of 18 natural populations of *P. viticola* collected in French vineyards in 2020. Biological tests and associated proportion of *P. viticola* sequence variants observed from *cytb* gene estimated by RT-PCR, pyrosequencing and NGS sequencing are given. For the biological tests, value of 100% indicates no resistance measured in the population for the fungicide, and 0% means totally resistant. Sequence *cytb* variants considered are described in Table 2. Only variants E203-DE-V204, S34L and G143A were detected in the field populations analysed and are given. All values are expressed in %. A dash indicates non detected or value below limit detection (threshold of 5% considered for NGS).

## 437 **Long reads can detect combination of variants along the same *cytb* sequence**

438 Short reads sequencing (Illumina or Ion Torrent) is interesting because of the high quality of the  
439 reads (reads with QV>25) and the low error rate, error rate that is even lower in Illumina reads  
440 than in Ion Torrent ones [54]. Both technologies are thus ideal to identify new substitutions or  
441 modifications with confidence. However, if overlapping short reads can be used and assembled  
442 to reconstruct a longer sequence when no diversity is present in the sample, they cannot be used  
443 to accurately perform phasing or to associate modifications occurring on different fragments in  
444 different proportion. At contrary long reads from ONT have lower quality (reads with QV<12),  
445 making sometimes more difficult to identify substitutions at low frequency. However, the  
446 diversity among a population of long fragments can be assessed with confidence, allowing to  
447 clearly identify different haplotypes and their proportion on long sequences.

448 Taking advantage of these NGS specificities, we searched in our datasets if in some cases, some  
449 variants could be present in combination along the same *cytb* sequence or if each variant  
450 correspond to different *cytb* sequences. The variants detected being not amplified on the same  
451 short fragments, long reads only, i.e. complete *cytb* sequences, were explored. Reads obtained  
452 for 12 populations exhibiting at least 2 types of variants were analysed in more details (Table 3,  
453 Fig 2). The same threshold of 5% was applied to consider as significant a proportion of reads  
454 exhibiting a combination of variants, leading to restrict the dataset to only 4 populations.

455 In the CONI-P16 sample, around 40% of the reads identified with the variant S34L, contain also  
456 the variant E203-DE-V204 (Fig 2). Very few reads (5.8%) were concerned by this combined  
457 pattern suggesting that only few strains of *P. viticola* could be double-resistant to cyazofamid  
458 and ametoctradin for now, or that the simultaneous presence of both *cytb* modifications could  
459 be deleterious for *P. viticola*. In consequence, the probability to isolate putatively viable single-  
460 sporangia strains by the experimental process described above was extremely low, and thus the



461 possibility to describe them by Sanger sequencing alone was very limited. On contrary, the ONT  
462 approach used in this study illustrates the ability of the method to detect very early the apparition  
463 of multiple variants strains in a field population by long read sequencing, with a deep sequencing  
464 coverage of the complete *cytb* obtained after PCR amplification.

465 By searching possible association of variant E203-DE-V204 and variant S34L with variant  
466 G143A in the same *cytb* sequence in all populations detecting at least two of them (Fig 2), one  
467 can observed than variant S34L and G143A are more often associated than any other  
468 combination. Both variants are SNPs regularly described in the literature since years as key  
469 point *cytb* mutations associated to resistance in plant pathogens [7]. For the 3 *P. viticola*  
470 populations collected that only shared S34L and G143A (CONI-P14, CONI-P15 and CONI-  
471 P18), 12.4% to 37.1% of reads with a variant are reads where the two variants are present. This  
472 is also the case for CONI-P13 (31.2%), in which 3 different variants were observed. In 3 out  
473 these 4 populations, both variants reach high percentages (Table 3), and are detected at low  
474 frequencies only in CONI-P15. It should be noticed that the 4 populations are localized in  
475 different departments, from different French regions, suggesting that this event could have  
476 occurred independently several times. The combination of G143A and S34L observed on long-  
477 reads suggests the existence of possible viable strains resistant to multiple fungicides (QoI and  
478 Ametoctradin), and could be not so rare. This is confirmed by the 2 resistant single-sporangia  
479 strains we were able to isolate in this study that combine the two variants (CONI-06 and CONI-  
480 13; Table 1) and by a similar strain identified in a previous publication [21].

**Fig 2.** *Cytb* sequences coming from field *P.viticola* populations can exhibit several modifications correlated to resistance to cyazofamid and ametoctradin. For each population where at least two different variants were detected (Table 3), and considering only ONT reads with variants, the percentage of each type of variant (E203-DE-V204, S34L or G143A; Table 2) observed in the same read is indicated in the

Venn diagram. Framed diagrams indicate populations with more than 5% reads exhibiting two different variants along the same sequence.

## 481 **Conclusion**

482 This study provides an overview on the structure of collected downy mildew populations in  
483 French vineyard. In addition of well-known resistance of *P. viticola* to QoI fungicides, resistant  
484 strains to other complex III inhibitors were detected. *P. viticola* develop resistance to  
485 ametoctradin by target modification with substitution S34L. New type of target modification by  
486 short nucleotides insertion was first time detected and reported by us in cyazofamid-resistant  
487 population in 2016. This mechanism consists in two different insertions of six nucleotides in  
488 *cytb* gene in Qi site. In other strains, amino acid substitution L201S also confers resistance to  
489 cyazofamid. No cross resistance was observed between cyazofamid and ametoctradin in isolated  
490 strains.

491 After identifying *cytb* variants of *P. viticola* associated with resistance, we combined classical  
492 (biological test assays, pyrosequencing and RT-PCR) and new sequencing approaches to  
493 monitor the variants at a population scale. This is a first study that combined all these methods  
494 at the same time at this scale. Analysis of 18 natural populations collected from field in 2020  
495 show that many resistant phenotypes to complex III inhibitors, exhibiting different genotypes,  
496 can co-exist in the same population. In particular, short reads revealed to be highly efficient to  
497 detect and characterize new variants, and all NGS technologies to detect various proportion of  
498 resistant strains in natural populations. The conclusions reached, strikingly in agreement  
499 between the different NGS approaches, are congruent in nearly most cases with the results  
500 generated by other molecular experiments using independent methods traditionally used for that  
501 purpose. Taken together, NGS approaches appear promising to monitor fungicide resistance

502 linked to *cytb* modifications or detect new putative resistant strains in natural populations of *P.*  
503 *viticola*, with a better sensitivity and a cost that will be reduced when mutualising many samples  
504 at the same time. This should help to detect earlier the emergence and the propagation of some  
505 resistance in vineyard against some fungicides more rapidly, in a larger geographic scale and  
506 with a larger number of samples, avoiding the use of less efficient chemicals.

507 Although mechanisms of resistance towards complex III inhibitors are complex and multiple,  
508 when they are associated to *cytb* sequence modification, long-read ONT sequencing should  
509 especially be seen as an interesting tool to assess resistance of pathogens potentially directly in  
510 the field thanks to portability and small size of ONT sequencers, as it was done to identify plant  
511 viruses [55–57]. Because the sequence error rate is expected to drastically drop for long reads  
512 in a near future, it should be possible to better detect and more rapidly characterize new *cytb*  
513 resistant variants in natural populations, even when present at low frequencies. If ONT could  
514 revolutionize in-field downy mildew diagnostics and biosurveillance in the future [58], ONT  
515 long reads could also be a robust decision-support tool in fungicide treatments in vineyard, and  
516 more generally, for all plant of agricultural interest where resistance is associated with sequence  
517 modification.

518

## 519 **Acknowledgments**

520 We thank the Freiburg Galaxy Team for the use of the Galaxy platform Europe. We also thank  
521 Emmanuel Quemener for the maintenance of the Galaxy platform at the ENS of Lyon.

522

523

## 524 **Author contributions**

525 Conceptualization: SC, CH, BG, SH and SV

526 Formal Analysis: SC, HS, BG, JD, SH

527 Funding Acquisition: SC, CH, BG, SH, SV

528 Investigation: SC, LB, PR, BG, CH, HS, LP

529 Project Administration: SC, CH, BG, SH, SV

530 Supervision: SC, CH, HS, BG, SH, SV

531 Writing – Original Draft Preparation: SC, BG, SH, SV

532 Writing – Review & Editing: SC, LB, JD, PR, BG, SH, CH, HS, LP, SV

533

## 534 **References**

535 1. Fröbel S, Zyprian E. Colonization of Different Grapevine Tissues by *Plasmopara*

536 *viticola*—A Histological Study. *Frontiers in Plant Science*. 2019;10. Available:

537 <https://www.frontiersin.org/article/10.3389/fpls.2019.00951>

538 2. Armijo G, Schlechter R, Agurto M, Muñoz D, Nuñez C, Arce-Johnson P. Grapevine

539 Pathogenic Microorganisms: Understanding Infection Strategies and Host Response Scenarios.

540 *Front Plant Sci*. 2016;7: 382. doi:10.3389/fpls.2016.00382

541 3. Kamoun S, Furzer O, Jones JDG, Judelson HS, Ali GS, Dalio RJD, et al. The Top 10

542 oomycete pathogens in molecular plant pathology. *Molecular Plant Pathology*. 2015;16: 413–

543 434. doi:10.1111/mpp.12190

544 4. Rossi V, Caffi T. The Role of Rain in Dispersal of the Primary Inoculum of *Plasmopara*

545 *viticola*. *Phytopathology*®. 2012;102: 158–165. doi:10.1094/PHYTO-08-11-0223

- 546 5. Gessler C, Pertot I, Perazzolli M. *Plasmopara viticola*: A review of knowledge on downy  
547 mildew of grapevine and effective disease management. *Phytopathologia Mediterranea*.  
548 2011;50: 3–44. doi:10.14601/Phytopathol\_Mediterr-9360
- 549 6. Rossi V, Giosuè S, Caffi T. Modelling the dynamics of infections caused by sexual and  
550 asexual spores during *Plasmopara Viticola* epidemics. *Journal of Plant Pathology*. 2009;91:  
551 615–627.
- 552 7. FRAC | Home. [cited 28 Mar 2022]. Available: <https://www.frac.info/>
- 553 8. Huang L, Cobessi D, Tung EY, Berry EA. Binding of the Respiratory Chain Inhibitor  
554 Antimycin to the Mitochondrial bc1 Complex: A New Crystal Structure Reveals an Altered  
555 Intramolecular Hydrogen-bonding Pattern. *Journal of Molecular Biology*. 2005;351: 573–597.  
556 doi:10.1016/j.jmb.2005.05.053
- 557 9. Grasso V, Palermo S, Sierotzki H, Garibaldi A, Gisi U. Cytochrome b gene structure  
558 and consequences for resistance to Qo inhibitor fungicides in plant pathogens. *Pest Management*  
559 *Science*. 2006;62: 465–472. doi:10.1002/ps.1236
- 560 10. Fisher N, Meunier B. Molecular basis of resistance to cytochrome bc1 inhibitors. *FEMS*  
561 *Yeast Research*. 2008;8: 183–192. doi:10.1111/j.1567-1364.2007.00328.x
- 562 11. Dufour M-C, Fontaine S, Montarry J, Corio-Costet M-F. Assessment of fungicide  
563 resistance and pathogen diversity in *Erysiphe necator* using quantitative real-time PCR assays.  
564 *Pest Management Science*. 2011;67: 60–69. doi:10.1002/ps.2032
- 565 12. Miles LA, Miles TD, Kirk WW, Schilder AMC. Strobilurin (QoI) Resistance in  
566 Populations of *Erysiphe necator* on Grapes in Michigan. *Plant Disease*. 2012;96: 1621–1628.  
567 doi:10.1094/PDIS-01-12-0041-RE
- 568 13. Chen W-J, Delmotte F, Cervera SR, Douence L, Greif C, Corio-Costet M-F. At Least  
569 Two Origins of Fungicide Resistance in Grapevine Downy Mildew Populations. *Applied and*  
570 *Environmental Microbiology*. 2007;73: 5162–5172. doi:10.1128/AEM.00507-07

- 571 14. Ma Z, Felts D, Michailides TJ. Resistance to azoxystrobin in *Alternaria* isolates from  
572 pistachio in California. *Pesticide Biochemistry and Physiology*. 2003;77: 66–74.  
573 doi:10.1016/j.pestbp.2003.08.002
- 574 15. Pasche JS, Wharam CM, Gudmestad NC. Shift in Sensitivity of *Alternaria solani* in  
575 Response to QoI Fungicides. *Plant Disease*. 2004;88: 181–187.  
576 doi:10.1094/PDIS.2004.88.2.181
- 577 16. Amand O, Calay F, Coquillart L, Legat T, Bodson B, Moreau JM, et al. First detection  
578 of resistance to QoI fungicides in *Mycosphaerella graminicola* on winter wheat in Belgium.  
579 *Commun Agric Appl Biol Sci*. 2003;68: 519–531.
- 580 17. Torriani SF, Brunner PC, McDonald BA, Sierotzki H. QoI resistance emerged  
581 independently at least 4 times in European populations of *Mycosphaerella graminicola*. *Pest*  
582 *Management Science*. 2009;65: 155–162. doi:10.1002/ps.1662
- 583 18. Corio-Costet M-F. Fungicide resistance in *Plasmopara viticola* in France and anti  
584 resistance measures. *Fungicide Resistance in crop protection : Risk and management*. CABI  
585 Publishing; 2011. p. 304 p. Available: <https://hal.inrae.fr/hal-02805838>
- 586 19. Gisi U, Sierotzki H, Cook A, McCaffery A. Mechanisms influencing the evolution of  
587 resistance to Qo inhibitor fungicides. *Pest Manag Sci*. 2002;58: 859–867. doi:10.1002/ps.565
- 588 20. Cherrad S, Hernandez C, Steva H, Vacher S. Resistance of *Plasmopara viticola* to  
589 complex III inhibitors: a point on the phenotypic and genotypic characterization of strains. 12e  
590 *Conférence Internationale sur les Maladies des Plantes*, 11 et 12 décembre 2018, Tours, France.  
591 2018; 449–459.
- 592 21. Fontaine S, Remuson F, Caddoux L, Barrès B. Investigation of the sensitivity of  
593 *Plasmopara viticola* to amisulbrom and ametoctradin in French vineyards using bioassays and  
594 molecular tools. *Pest Management Science*. 2019;75: 2115–2123. doi:10.1002/ps.5461
- 595 22. Fisher N, Meunier B, Biagini GA. The cytochrome bc1 complex as an antipathogenic

- 596 target. FEBS Letters. 2020;594: 2935–2952. doi:10.1002/1873-3468.13868
- 597 23. Samils B, Andersson B, Edin E, Elfstrand M, Rönneburg T, Bucur D, et al. Development  
598 of a PacBio Long-Read Sequencing Assay for High Throughput Detection of Fungicide  
599 Resistance in *Zymoseptoria tritici*. *Frontiers in Microbiology*. 2021;12. Available:  
600 <https://www.frontiersin.org/article/10.3389/fmicb.2021.692845>
- 601 24. Pereira D, McDonald BA, Croll D. The Genetic Architecture of Emerging Fungicide  
602 Resistance in Populations of a Global Wheat Pathogen. *Genome Biol Evol*. 2020;12: 2231–  
603 2244. doi:10.1093/gbe/evaa203
- 604 25. Waterhouse AM, Procter JB, Martin DMA, Clamp M, Barton GJ. Jalview Version 2—  
605 a multiple sequence alignment editor and analysis workbench. *Bioinformatics*. 2009;25: 1189–  
606 1191. doi:10.1093/bioinformatics/btp033
- 607 26. Li H. Minimap2: pairwise alignment for nucleotide sequences. *Bioinformatics*. 2018;34:  
608 3094–3100. doi:10.1093/bioinformatics/bty191
- 609 27. Garrison E, Marth G. Haplotype-based variant detection from short-read sequencing.  
610 arXiv:12073907 [q-bio]. 2012 [cited 28 Mar 2022]. Available: <http://arxiv.org/abs/1207.3907>
- 611 28. Garrison E, Kronenberg ZN, Dawson ET, Pedersen BS, Prins P. Vcfliib and tools for  
612 processing the VCF variant call format. *bioRxiv*; 2021. p. 2021.05.21.445151.  
613 doi:10.1101/2021.05.21.445151
- 614 29. Camacho C, Coulouris G, Avagyan V, Ma N, Papadopoulos J, Bealer K, et al. BLAST+:  
615 architecture and applications. *BMC Bioinformatics*. 2009;10: 421. doi:10.1186/1471-2105-10-  
616 421
- 617 30. Fehr M, Wolf A, Stammler G. Binding of the respiratory chain inhibitor ametoctradin to  
618 the mitochondrial bc1 complex. *Pest Management Science*. 2016;72: 591–602.  
619 doi:10.1002/ps.4031
- 620 31. Dreinert A, Wolf A, Mentzel T, Meunier B, Fehr M. The cytochrome bc1 complex

- 621 inhibitor Ametoctradin has an unusual binding mode. *Biochimica et Biophysica Acta (BBA) -*  
622 *Bioenergetics*. 2018;1859: 567–576. doi:10.1016/j.bbabbio.2018.04.008
- 623 32. Lucas JA, Hawkins NJ, Fraaije BA. Chapter Two - The Evolution of Fungicide  
624 Resistance. In: Sariaslani S, Gadd GM, editors. *Advances in Applied Microbiology*. Academic  
625 Press; 2015. pp. 29–92. doi:10.1016/bs.aambs.2014.09.001
- 626 33. Mounkoro P, Michel T, Benhachemi R, Surpateanu G, Iorga BI, Fisher N, et al.  
627 Mitochondrial complex III Qi-site inhibitor resistance mutations found in laboratory selected  
628 mutants and field isolates. *Pest Management Science*. 2019;75: 2107–2114.  
629 doi:10.1002/ps.5264
- 630 34. Toffolatti SL, Serrati L, Sierotzki H, Gisi U, Vercesi A. Assessment of QoI resistance in  
631 *Plasmopara viticola* oospores. *Pest Management Science*. 2007;63: 194–201.  
632 doi:10.1002/ps.1327
- 633 35. Malandrakis AA, Markoglou AN, Nikou DC, Vontas JG, Ziogas BN. Molecular  
634 diagnostic for detecting the cytochrome b G143S – QoI resistance mutation in *Cercospora*  
635 *beticola*. *Pesticide Biochemistry and Physiology*. 2011;100: 87–92.  
636 doi:10.1016/j.pestbp.2011.02.011
- 637 36. Martinelli F, Scalenghe R, Davino S, Panno S, Scuderi G, Ruisi P, et al. Advanced  
638 methods of plant disease detection. A review. *Agron Sustain Dev*. 2015;35: 1–25.  
639 doi:10.1007/s13593-014-0246-1
- 640 37. Rallos LEE, Baudoin AB. Co-Occurrence of Two Allelic Variants of CYP51 in *Erysiphe*  
641 *necator* and Their Correlation with Over-Expression for DMI Resistance. *PLOS ONE*. 2016;11:  
642 e0148025. doi:10.1371/journal.pone.0148025
- 643 38. Massi F, Torriani SFF, Borghi L, Toffolatti SL. Fungicide Resistance Evolution and  
644 Detection in Plant Pathogens: *Plasmopara viticola* as a Case Study. *Microorganisms*. 2021;9:  
645 119. doi:10.3390/microorganisms9010119



- 646 39. Blum M, Waldner M, Gisi U. A single point mutation in the novel PvCesA3 gene confers  
647 resistance to the carboxylic acid amide fungicide mandipropamid in *Plasmopara viticola*. *Fungal*  
648 *Genetics and Biology*. 2010;47: 499–510. doi:10.1016/j.fgb.2010.02.009
- 649 40. Santos RF, Fraaije BA, Garrido L da R, Monteiro-Vitorello CB, Amorim L. Multiple  
650 resistance of *Plasmopara viticola* to QoI and CAA fungicides in Brazil. *Plant Pathology*.  
651 2020;69: 1708–1720. doi:10.1111/ppa.13254
- 652 41. Rehfus A, Miessner S, Achenbach J, Strobel D, Bryson R, Stammler G. Emergence of  
653 succinate dehydrogenase inhibitor resistance of *Pyrenophora teres* in Europe. *Pest Management*  
654 *Science*. 2016;72: 1977–1988. doi:10.1002/ps.4244
- 655 42. Zhou T, Mehl HL. Rapid quantification of the G143A mutation conferring fungicide  
656 resistance in Virginia populations of *Cercospora soja* using pyrosequencing. *Crop Protection*.  
657 2020;127: 104942. doi:10.1016/j.cropro.2019.104942
- 658 43. Assinger T, Fountaine J, Torriani S, Accardo S, Bernhard-Frey R, Gottula J, et al.  
659 Detection of *Ramularia collo-cygni* DMI- and SDHI-resistant field populations in Austria and  
660 the effect of fungicides on the population and genetic diversity. *Eur J Plant Pathol*. 2022;162:  
661 575–594. doi:10.1007/s10658-021-02422-5
- 662 44. Hendriksen RS, Bortolaia V, Tate H, Tyson GH, Aarestrup FM, McDermott PF. Using  
663 Genomics to Track Global Antimicrobial Resistance. *Frontiers in Public Health*. 2019;7.  
664 Available: <https://www.frontiersin.org/article/10.3389/fpubh.2019.00242>
- 665 45. Berbers B, Saltykova A, Garcia-Graells C, Philipp P, Arella F, Marchal K, et al.  
666 Combining short and long read sequencing to characterize antimicrobial resistance genes on  
667 plasmids applied to an unauthorized genetically modified *Bacillus*. *Sci Rep*. 2020;10: 4310.  
668 doi:10.1038/s41598-020-61158-0
- 669 46. Taxt AM, Avershina E, Frye SA, Naseer U, Ahmad R. Rapid identification of pathogens,  
670 antibiotic resistance genes and plasmids in blood cultures by nanopore sequencing. *Sci Rep*.

671 2020;10: 7622. doi:10.1038/s41598-020-64616-x

672 47. Liewing LW, Waite DW, Thompson JR. Application of Oxford Nanopore Technology  
673 to Plant Virus Detection. *Viruses*. 2021;13: 1424. doi:10.3390/v13081424

674 48. Kankanala P, Nandety RS, Mysore KS. Genomics of Plant Disease Resistance in  
675 Legumes. *Frontiers in Plant Science*. 2019;10. Available:  
676 <https://www.frontiersin.org/article/10.3389/fpls.2019.01345>

677 49. Pieczul K, Wąsowska A. The application of next-generation sequencing (NGS) for  
678 monitoring of *Zymoseptoria tritici* QoI resistance. *Crop Protection*. 2017;92: 143–147.  
679 doi:10.1016/j.cropro.2016.10.026

680 50. Van Leeuwen T, Vanholme B, Van Pottelberge S, Van Nieuwenhuysse P, Nauen R, Tirry  
681 L, et al. Mitochondrial heteroplasmy and the evolution of insecticide resistance: Non-Mendelian  
682 inheritance in action. *Proceedings of the National Academy of Sciences*. 2008;105: 5980–5985.  
683 doi:10.1073/pnas.0802224105

684 51. Hu M, Chen S. Non-Target Site Mechanisms of Fungicide Resistance in Crop  
685 Pathogens: A Review. *Microorganisms*. 2021;9: 502. doi:10.3390/microorganisms9030502

686 52. Mosquera S, Chen L-H, Aegerter B, Miyao E, Salvucci A, Chang T-C, et al. Cloning of  
687 the Cytochrome b Gene From the Tomato Powdery Mildew Fungus *Leveillula taurica* Reveals  
688 High Levels of Allelic Variation and Heteroplasmy for the G143A Mutation. *Frontiers in*  
689 *Microbiology*. 2019;10. Available:  
690 <https://www.frontiersin.org/article/10.3389/fmicb.2019.00663>

691 53. Magnien C, Micoud A, Glain M, Remuson F. QoI resistance of downy mildew-  
692 monitoring and tests 2002. Ann 7th Int Conf Plant Dis, Tours, France(On CD-ROM). 2003.

693 54. Salipante SJ, Kawashima T, Rosenthal C, Hoogstraal DR, Cummings LA, Sengupta  
694 DJ, et al. Performance Comparison of Illumina and Ion Torrent Next-Generation Sequencing  
695 Platforms for 16S rRNA-Based Bacterial Community Profiling. *Applied and Environmental*

- 696 Microbiology. 2014;80: 7583–7591. doi:10.1128/AEM.02206-14
- 697 55. Boykin L, Ghalab A, Marchi BRD, Savill A, Wainaina JM, Kinene T, et al. Real time  
698 portable genome sequencing for global food security. F1000Research; 2018.  
699 doi:10.12688/f1000research.15507.1
- 700 56. Boykin LM, Sseruwagi P, Alicai T, Ateka E, Mohammed IU, Stanton J-AL, et al. Tree  
701 Lab: Portable Genomics for Early Detection of Plant Viruses and Pests in Sub-Saharan Africa.  
702 Genes. 2019;10: 632. doi:10.3390/genes10090632
- 703 57. Shaffer L. Portable DNA sequencer helps farmers stymie devastating viruses.  
704 Proceedings of the National Academy of Sciences. 2019;116: 3351–3353.  
705 doi:10.1073/pnas.1901806116
- 706 58. Salcedo AF, Purayannur S, Standish JR, Miles T, Thiessen L, Quesada-Ocampo LM.  
707 Fantastic Downy Mildew Pathogens and How to Find Them: Advances in Detection and  
708 Diagnostics. Plants. 2021;10: 435. doi:10.3390/plants10030435

709

## 710 **Supporting information**

711

712 **Fig S1. Pyrograms showing allele quantification of E203-DE-V204 and L201S variants**  
713 **from sensitive and cyazofamid-resistant *P. viticola* strains.** Pyrograms show DNA extract of  
714 single sporangia isolates CONI-01 (A), CONI-16 (B) and CONI-38 (C). Nucleotides position  
715 from 11 to 24 represents the variable region to be analysed to detect insertion E203-DE-V204  
716 (B). Nucleotide in position 28 concern quantification of L201S substitution (C).

717

718 **Fig S2. Pyrograms showing allele quantification of E203-VE-V204 variant from sensitive**  
719 **and cyazofamid-resistant *P. viticola* strains.** Pyrograms show DNA extract of single sporangia

720 isolates CONI-01 (A) and CONI-39 (B). Nucleotides positions 8 to 10 represents the variable  
721 region to be analysed to detect insertion E203-VE-V204 (B).

722

723 **Table S1: Detection and frequency of E203-DE-V204, E203-VE-V204 and L201S variants**  
724 **observed with short-read (Ion Torrent) and long-read (ONT) sequencing of cytb gene**  
725 **amplified from single sporangia strains.** For Ion Torrent data, variants were searched without  
726 a priori with Torrent Variant Caller (somatic and low stringency parameters) and only variants  
727 above 5% are reported. For ONT data, two dedicated pipelines using either BLAST or  
728 Nanopolish were tested. The 3 variants were specifically targeted in all samples.

729

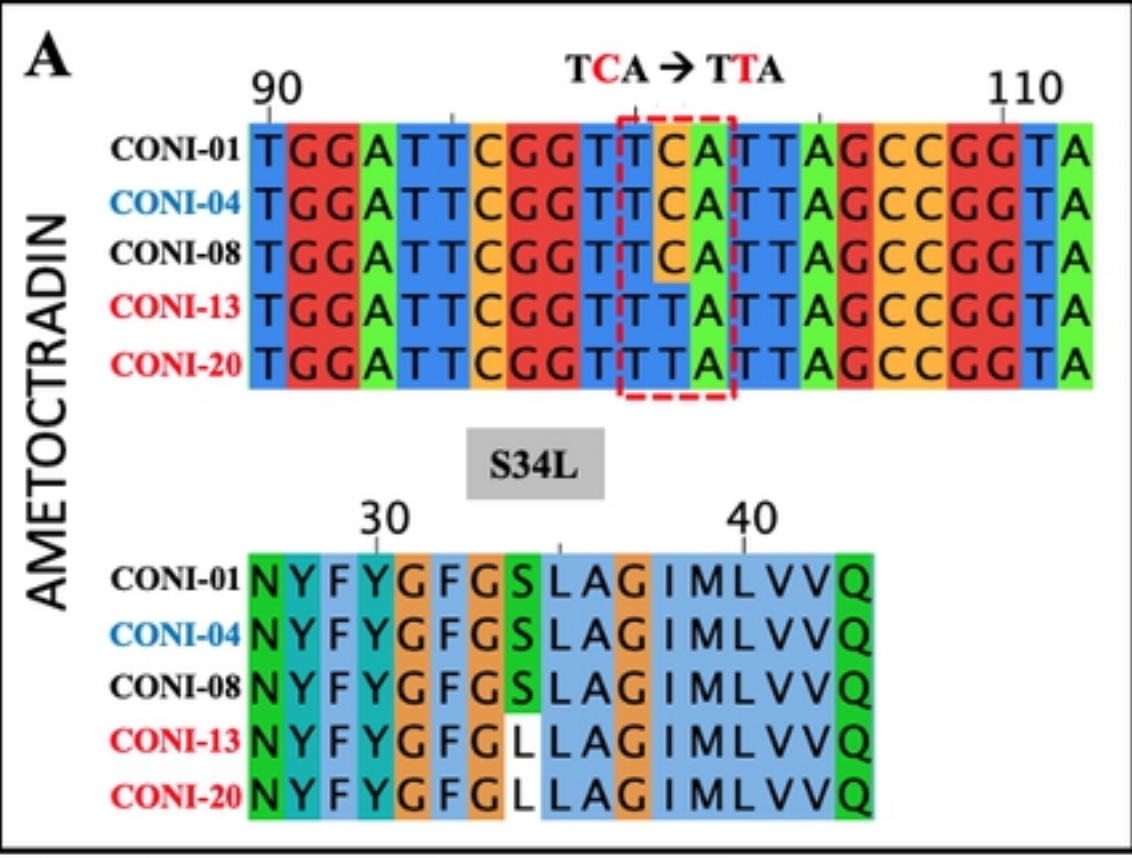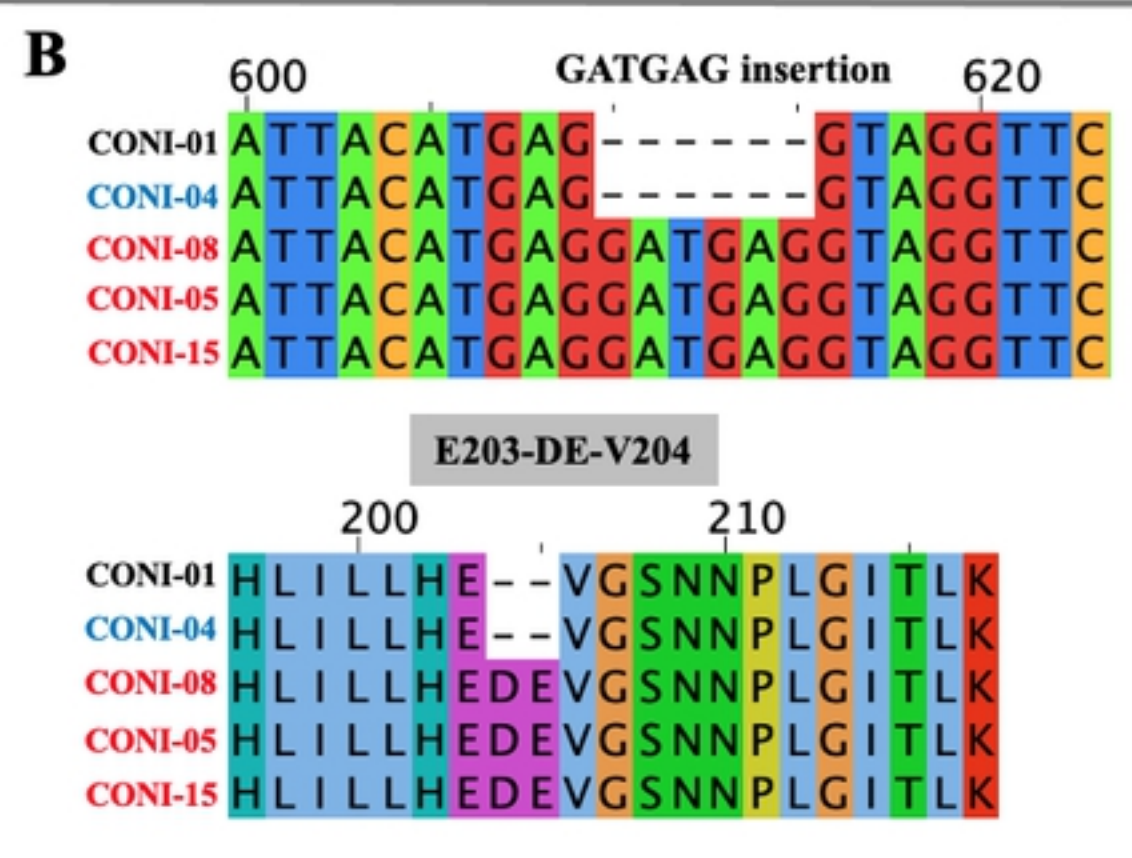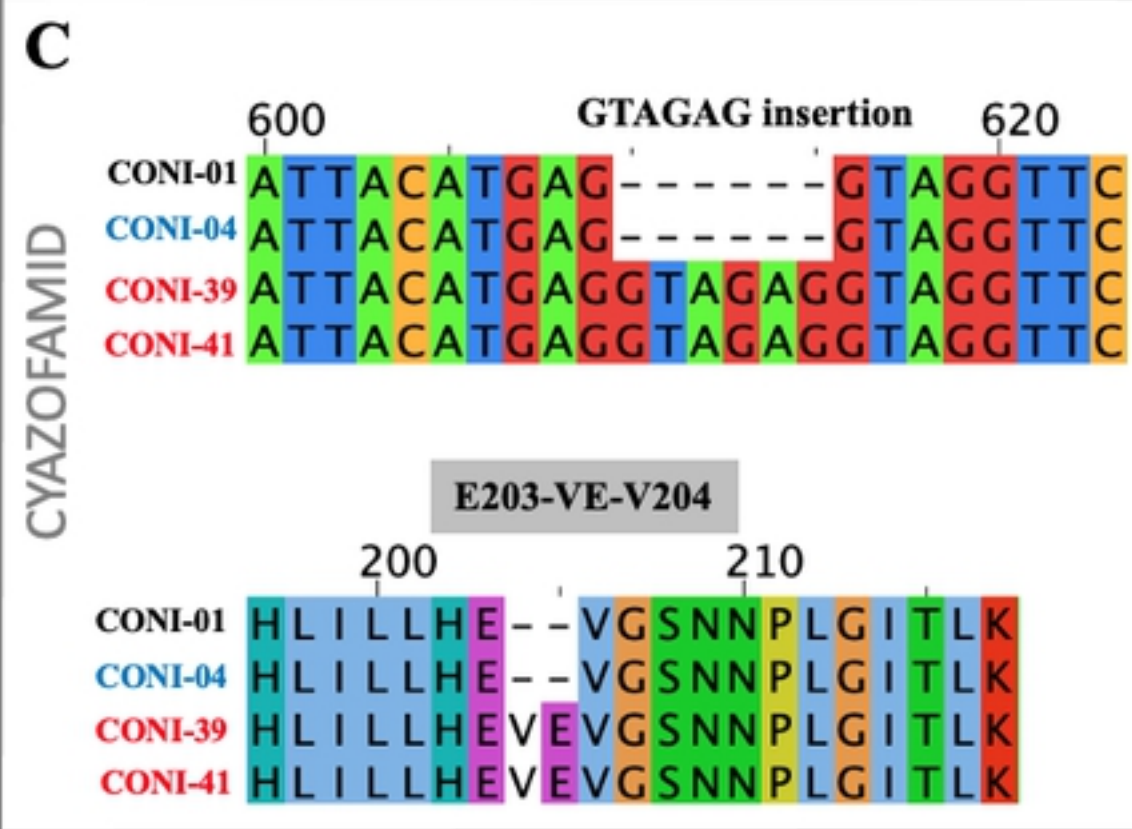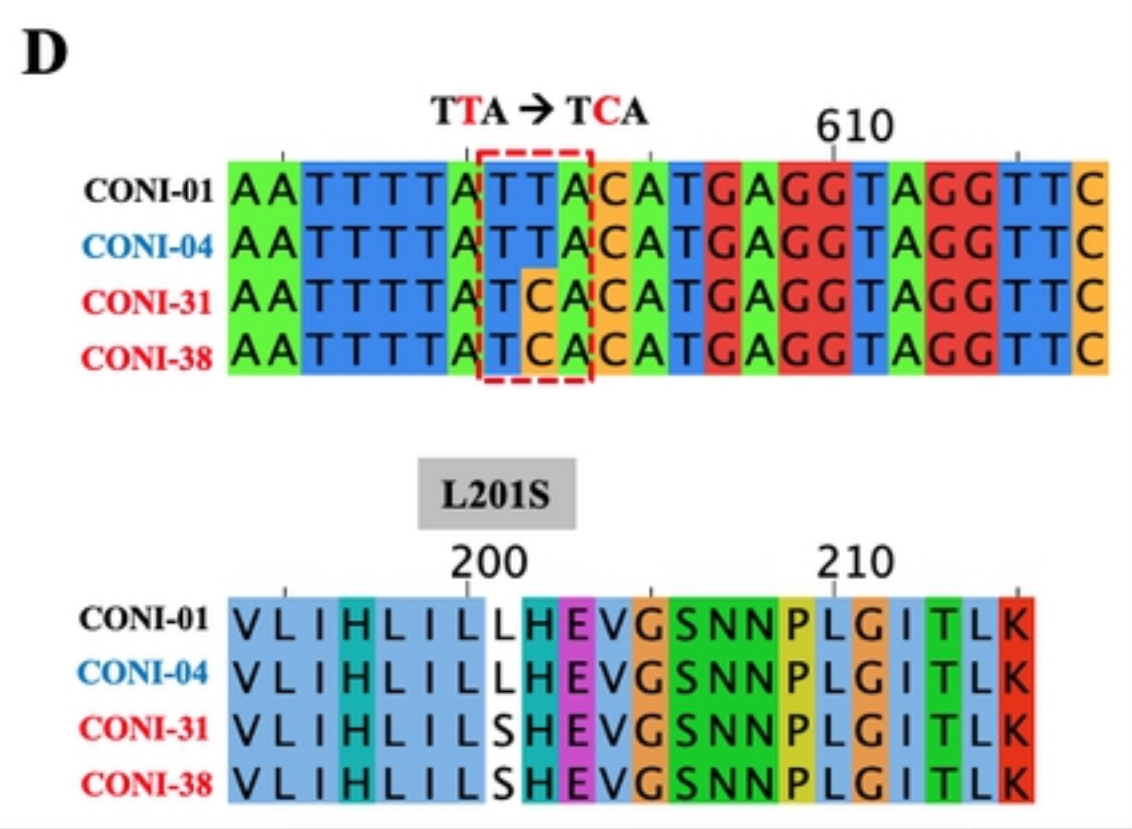

Figure 1

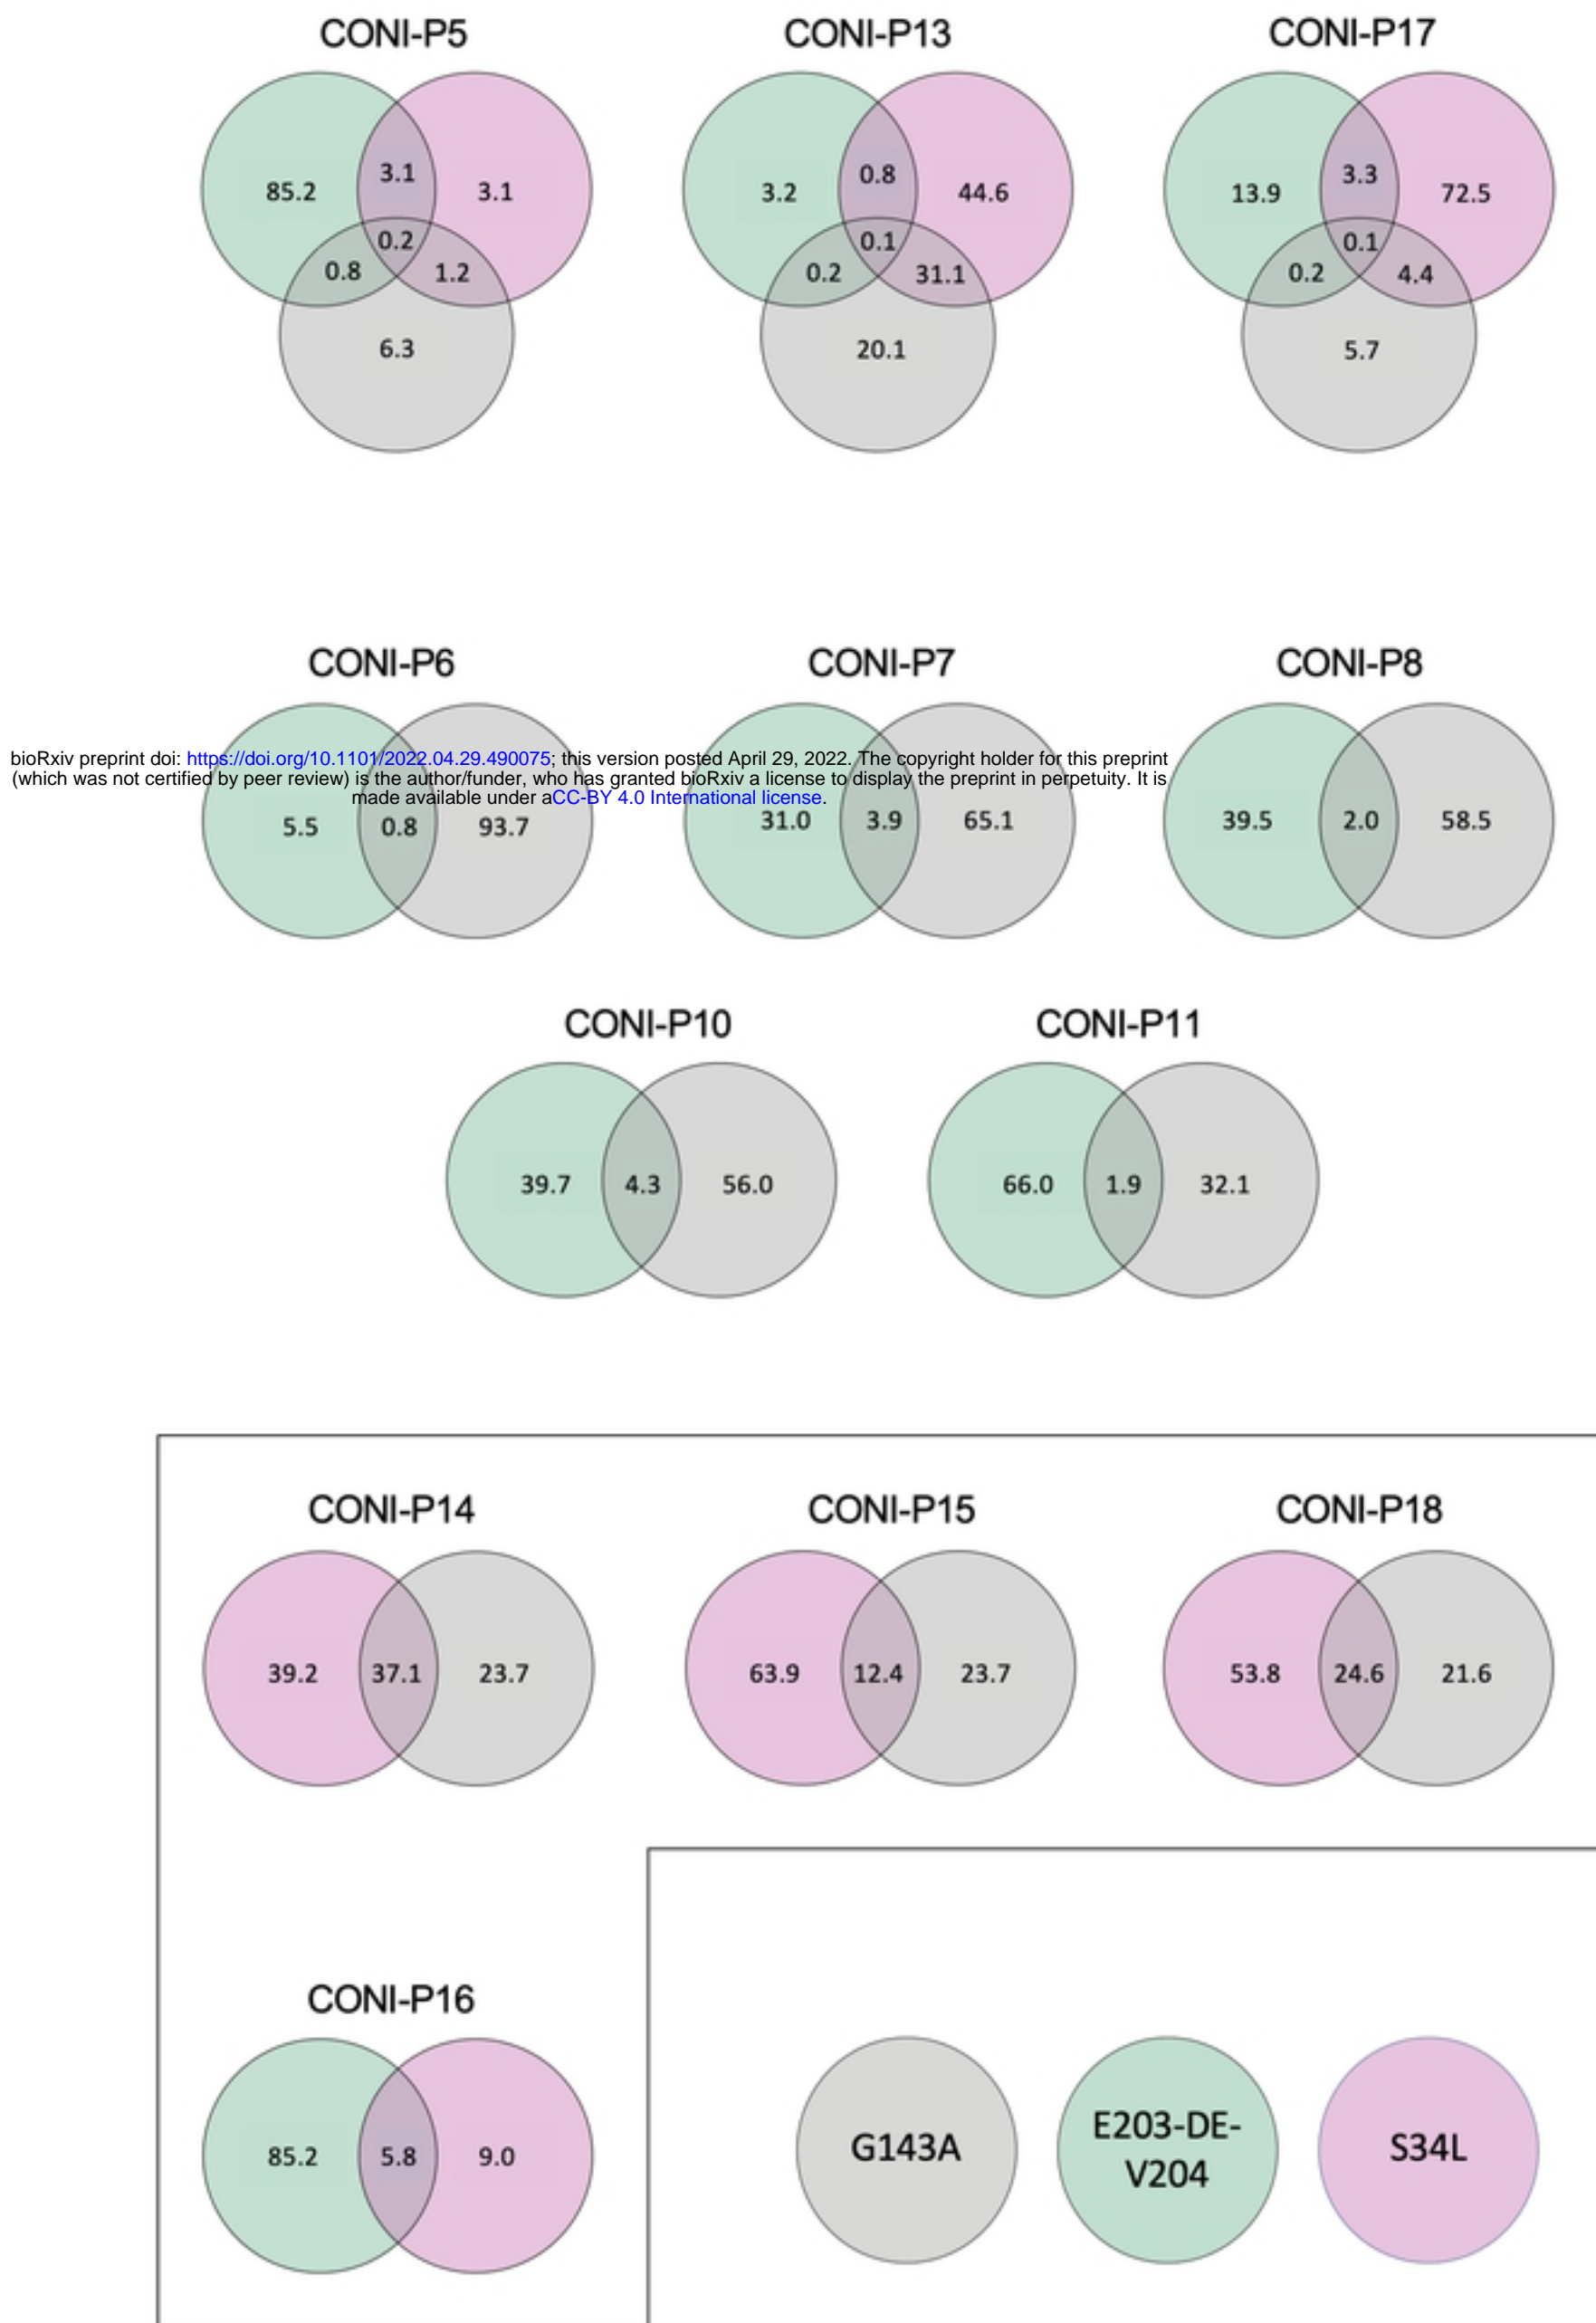

Figure 2
